# Supplementary material
Source: Springer Nature journal article supplement (https://www.springermedizin.de/resource/supplementary/12913_2013_3035_MOESM3_ESM.pdf/9533284)

**Topic:** Something around not doing anything today and storing up problems for the future

**Quote:** "I just got a letter telling me about my kidneys weren't right and it's still on my notice board and I said, "No you've got me mixed up with somebody else". He said, "No you've got kidney disease". So I said, "Well where can I go, what can I do, what can I buy, you know?"

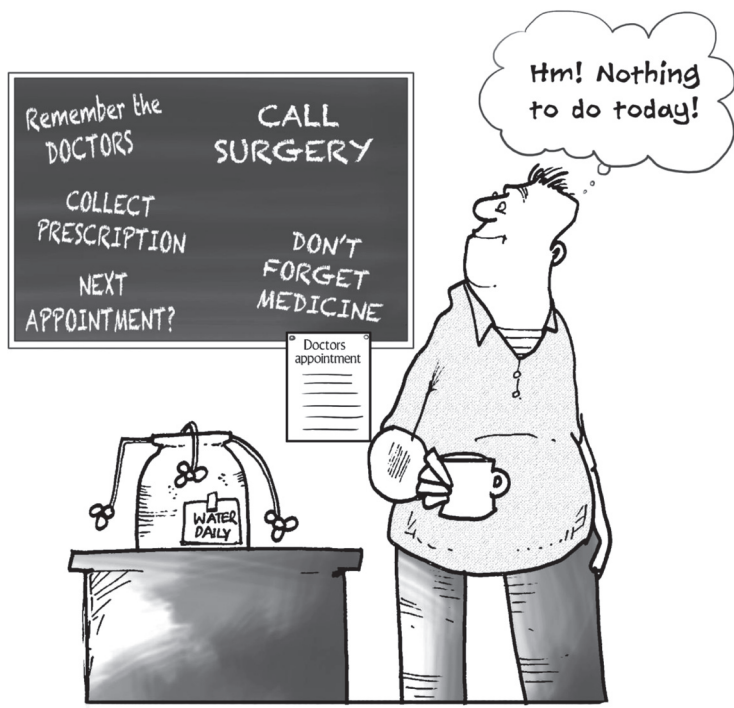

Supplement: MOESM3 [file 9533284]
